# Supplementary material
Source: PubMed Central journal article supplement (PMC11017868)
Supplement: media-1.pdf [file media-1.pdf]

a

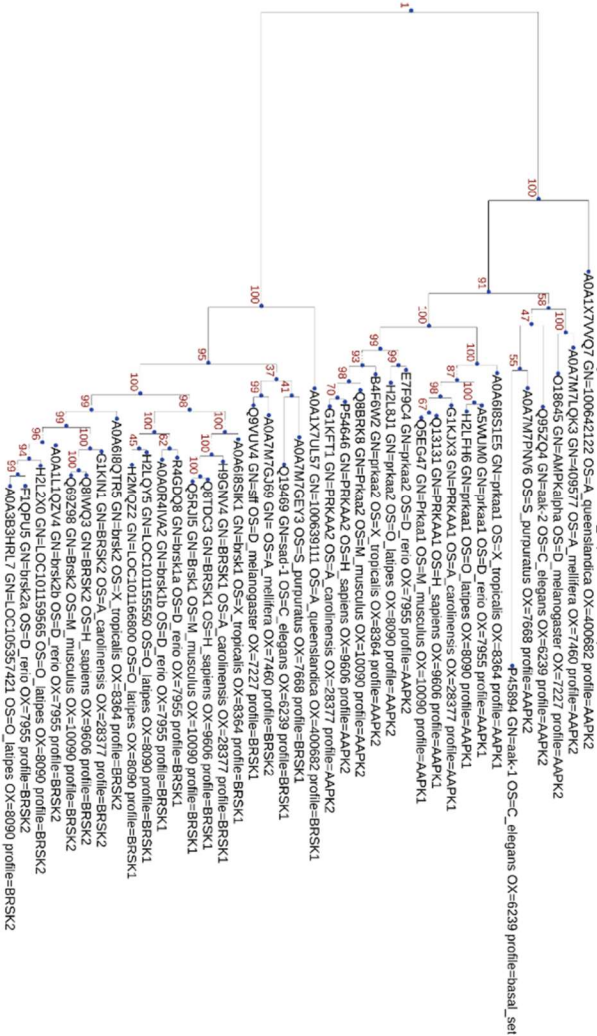

b2-83 Loop

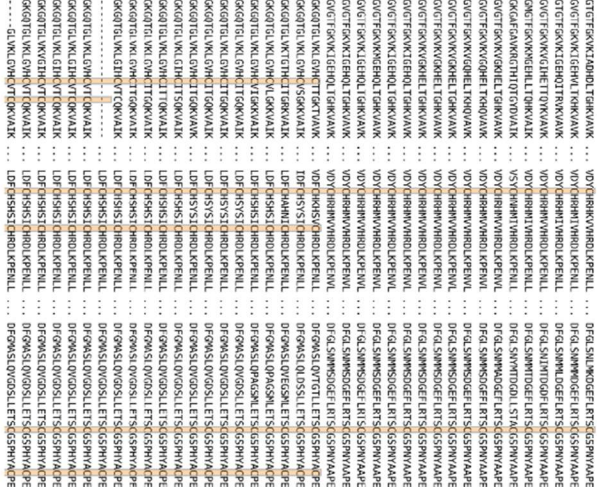

HRD Motif

T-Loop

BRSK Cys

EPK Motif

1246

b

HRD Motif

T-Loop

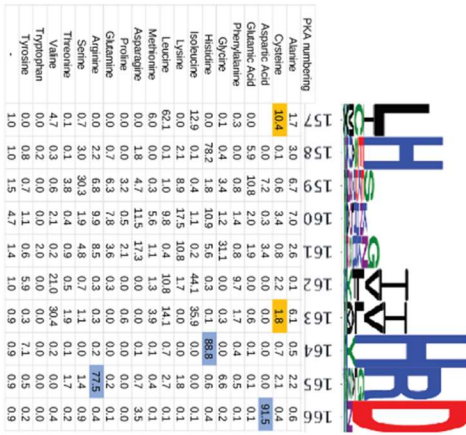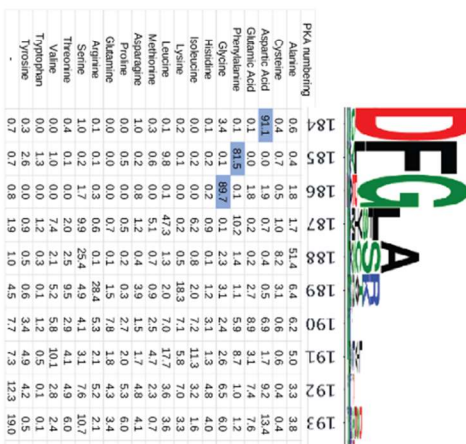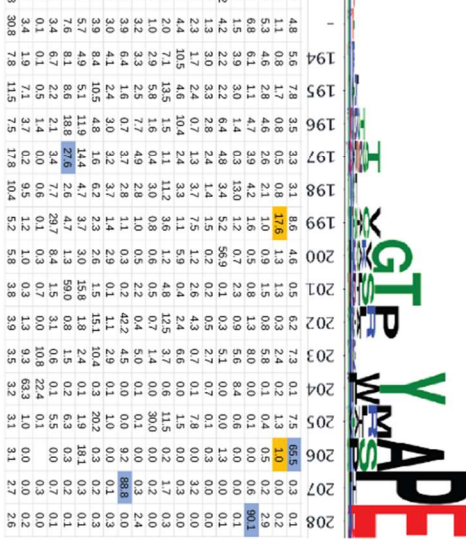

1247

1248 Supplementary Figure 1: Phylogenetic analysis of BRSK and the ARK family. (a)  
1249 Phylogenetic analysis of the ARK family reveals that the closest relative of BRSK  
1250 kinases is AMPK. The number of cysteines in the kinase domain of BRSKs  
1251 increases relative to AMPK. (b) Sequence alignment and relative amino acid  
1252 composition of the activation segment of ePKs (top). Data is presented as HMM  
1253 (hidden Markov models) Sequence Logos. Table (bottom) depicts the frequency  
1254 of an amino acid at each position along the Catalytic and T-Loop. Key Cys  
1255 residues are highlighted in orange; residues highly conserved in ePK canonical  
1256 kinase motifs are highlighted in blue.  
1257  
1258  
1259

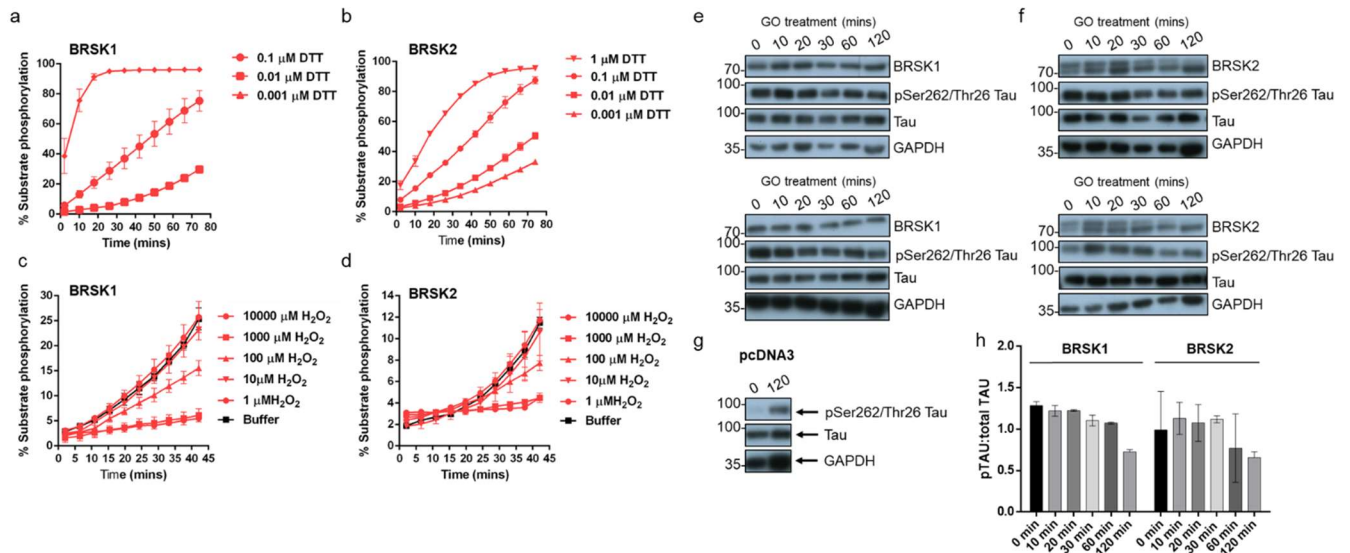

Supplementary Figure 2: Redox regulation of BRSK1 & 2. (a-d) Real-time phosphorylation of fluorescent AMARA peptide by full length BRSK1 and 2 (200 ng). BRSK proteins were incubated with buffer or the indicated concentrations of DTT or H<sub>2</sub>O<sub>2</sub>. Rates of BRSK activity were calculated as pmol per min phosphate incorporation and are presented in Fig 1. Data shown here is a subset of the conditions shown in Fig 1 (mean and SD from three repeats). (e-h) Time dependent loss of pTAU by incubation of HEK-293T cells with 2U/ml glucose oxidase (GO). Cells were transiently co-transfected with EGFP-Tau and either (e) BRSK1, (f) BRSK2 or (g) empty vector (pcDNA3). Data shown is WB analysis from 2 independent repeats. (h) pTau: Tau signals calculated with ImageJ. Data shown is mean and SD, calculated from (e) and (f).

1260

BRSK1 WT SAMPLE

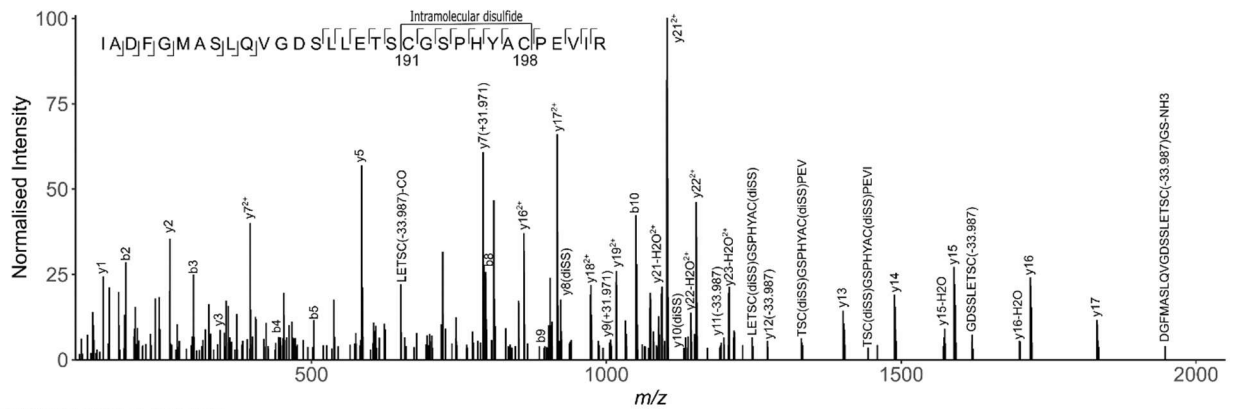

BRSK1 WT SAMPLE

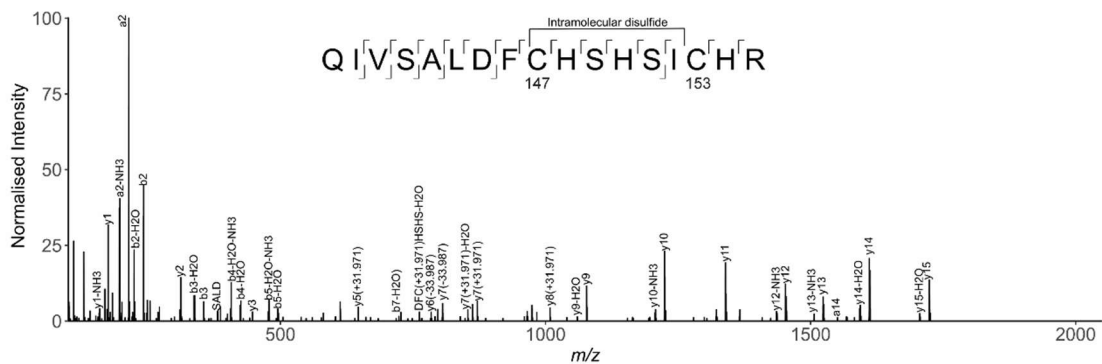

BRSK 2 WT SAMPLE

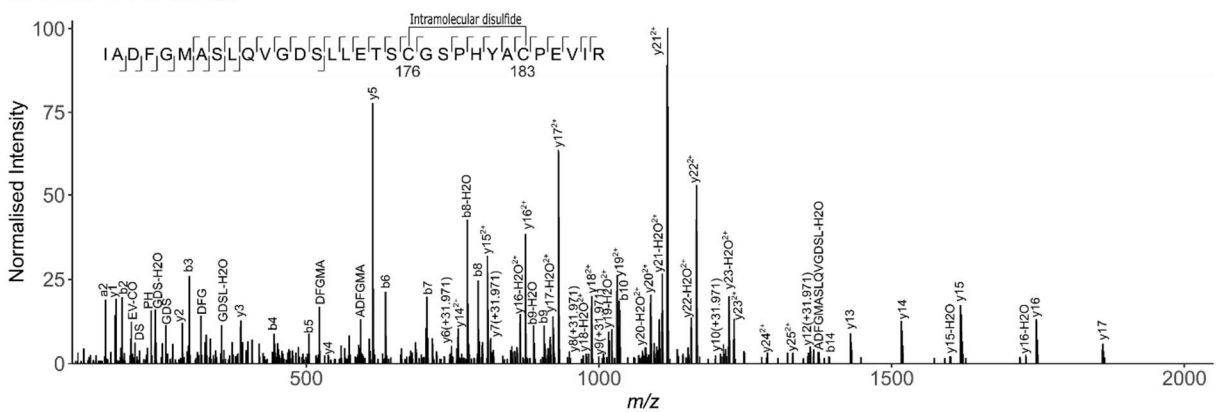

1261

1262 Supplementary Figure 3: LC-MS/MS Analysis of BRSK1/2 catalytic domains. LC-  
 1263 MS/MS reveals intramolecular disulfide bonds in the kinase domains of BRSK1  
 1264 and 2 purified from *E. coli*.

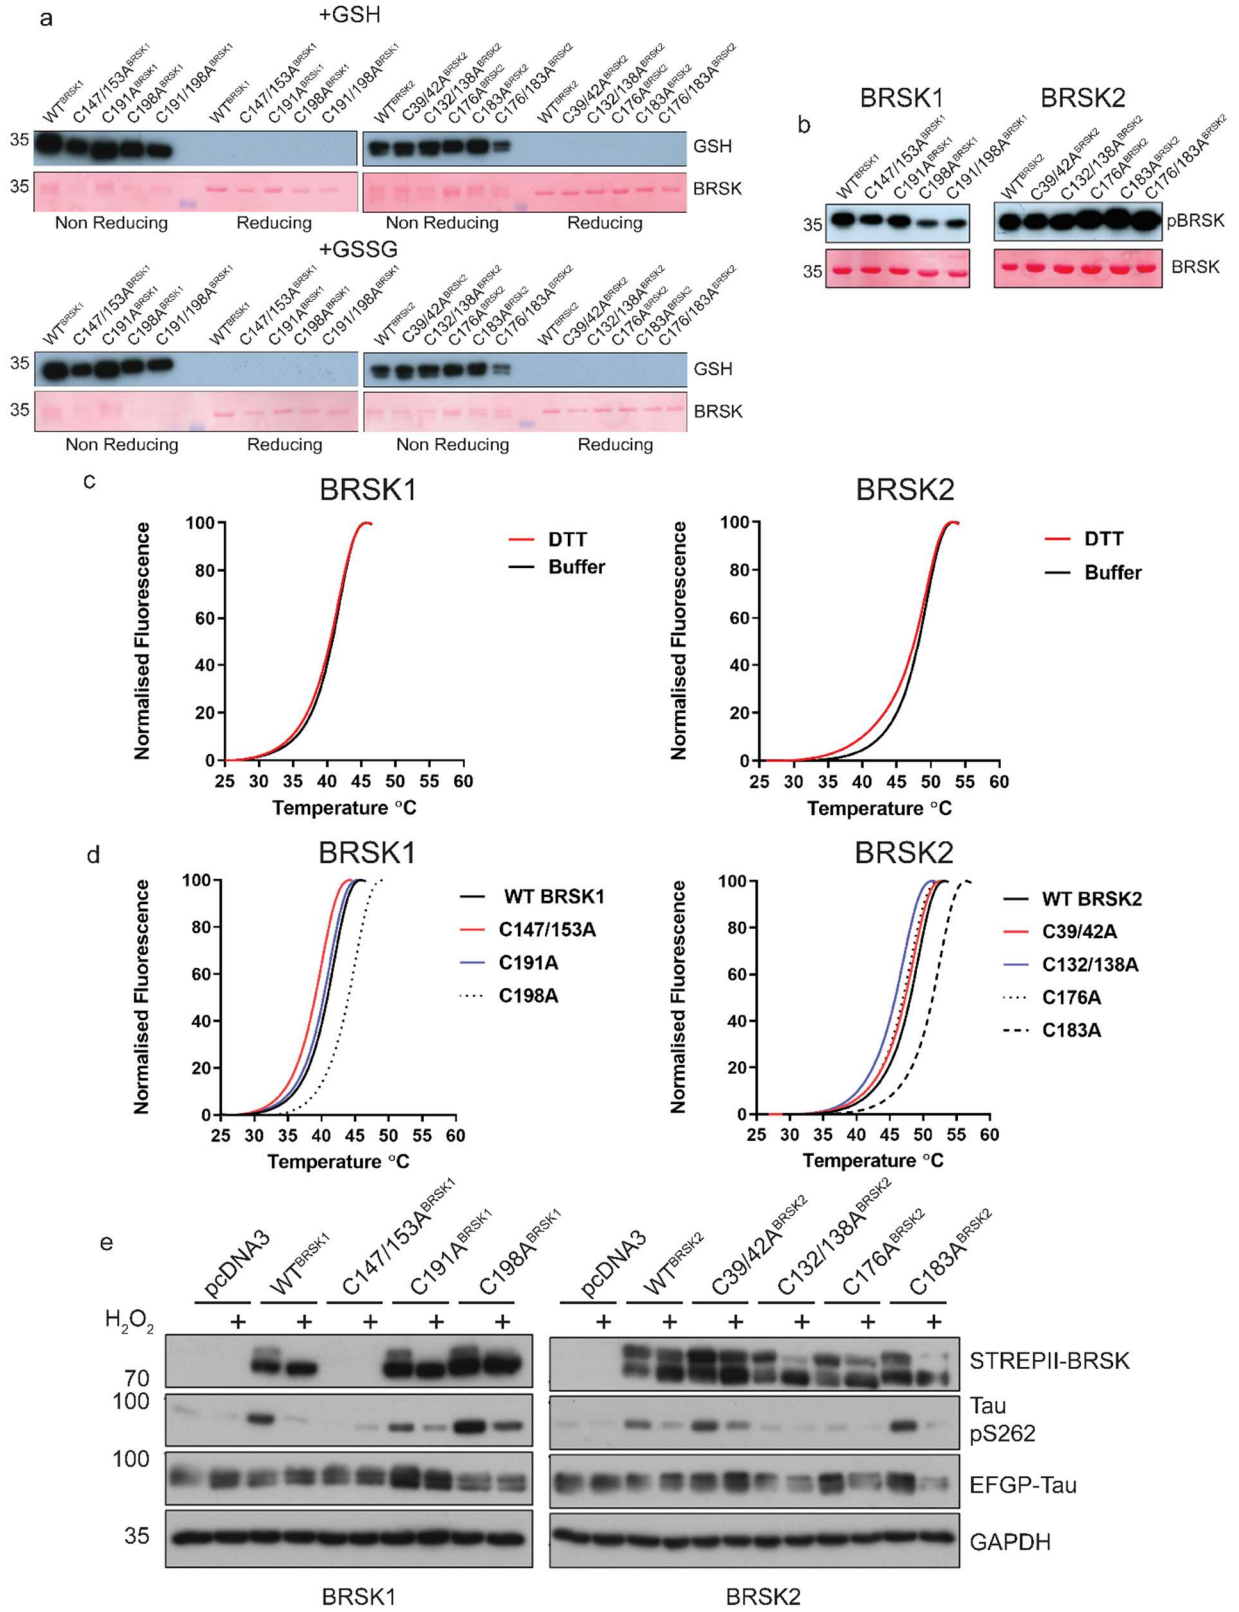

1266 Supplementary Figure 4: Biochemical analysis of BRSK Cys-to Ala mutants. (a)  
1267 Immunoblot of in vitro glutathionylation of BRSK kinase domains. (b) Immunoblot  
1268 showing LKB1-dependent phosphorylation of BRSK kinase domain proteins. (c)  
1269 Thermal denaturation curves of BRSK catalytic domain proteins in the presence  
1270 or absence of 10 mM DTT. (d) Thermal denaturation curves of BRSK catalytic  
1271 domain cysteine to alanine mutants. (e) Representative immunoblot of EGFP-  
1272 Tau co-expressed with full length, WT and Cys-to-Ala mutants of BRSK1 and  
1273 BRSK2. Transiently transfected HEK-293T cells were treated with or without 10  
1274 mM H<sub>2</sub>O<sub>2</sub> for 10 mins.

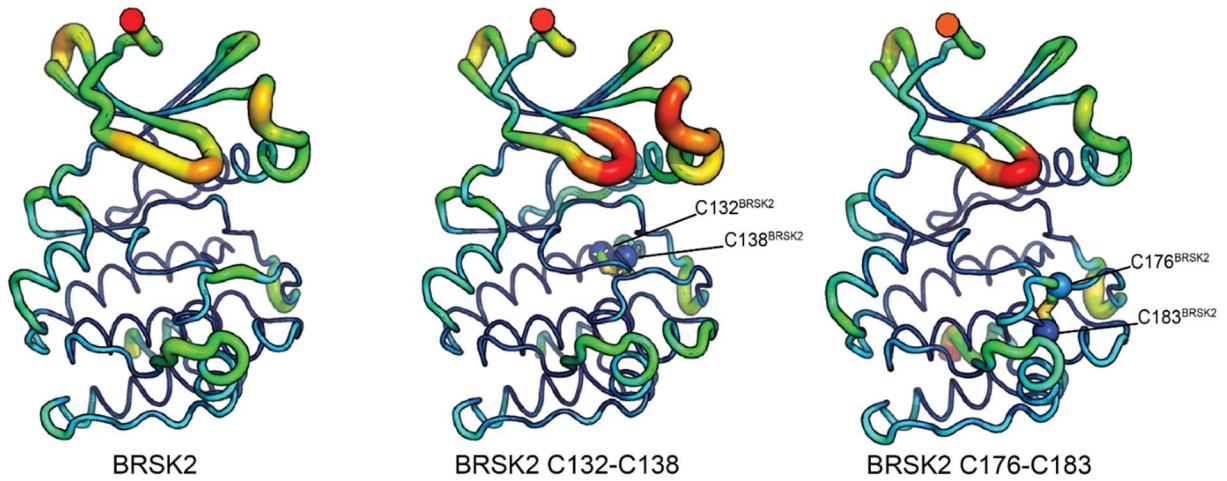

1275 Supplementary Figure 5: Molecular Dynamics Simulations of intramolecular disulfide  
1276 bonds. Simulations incorporating disulfide bonds identified in MS/MS  
1277 experiments. RMSF was calculated based on three 100 ns GROMACS molecular  
1278 dynamics simulations. Higher mobility is indicated by warmer colors and  
1279 thickness of representation.  
1280  
1281  
1282
